# Supplementary material for: Engineering exposed vertical nano-TiO2 (001) facets/BiOI nanosheet heterojunction film for constructing a satisfactory PEC glucose oxidase biosensor
Source: Royal Society of Chemistry journal article supplement (doi:10.1039/d2ra03070e), 2022-01-01
Supplement: d2ra03070e1.pdf [file d2ra03070e1.pdf]

## Supporting information

### **Engineering exposed vertical nano TiO<sub>2</sub> (001) facets/BiOI nanosheet heterojunction film for constructing a satisfied PEC glucose oxidase biosensor**

*Baiqiang Wu<sup>a</sup>, Zike Cheng<sup>a</sup>, Yao Hou<sup>a</sup>, Qian Chen<sup>b\*</sup>, Xiaohong Wang<sup>a</sup>, Bin Qiao<sup>a</sup>, Delun Chen<sup>a</sup>, Jinchun Tu<sup>a\*</sup>*

*<sup>a</sup> State Key Laboratory of Marine Resource Utilization in South China Sea, College of Materials Science and Engineering, Hainan University, Haikou 570228, China.*

*<sup>b</sup> Department of Clinical Laboratory, the First Affiliated Hospital of Hainan Medical University, Haikou 570102, China.*

*<sup>c</sup> Department of Clinical Laboratory of the Second Affiliated Hospital, School of Tropical Medicine, Key Laboratory of Emergency and Trauma of Ministry of Education, Research Unit of Island Emergency Medicine, Chinese Academy of Medical Sciences (No. 2019RU013), Hainan Medical University, Haikou 571199, China.*

*\* Corresponding author. E-mail address:*

*251100736@qq.com (Qian Chen),*

*tujinchun@hainanu.edu.cn (Jinchun Tu).*

## SI-1

### Experimental steps for photo deposition of $\text{MnO}_2$

(All reagents were of analytical grade without subsequent processing.)

First, 20 mL of deionized water was added to the beaker, 2 mL of 1 mg/mL  $\text{MnSO}_4$  solution was added, and the solution was stirred evenly. Next, 0.2 g of  $\text{NaIO}_3$  was added, and the solution was mixed and stirred until uniform. The prepared  $\text{TiO}_2$  NSs were placed at the bottom of the beaker and illuminated under a xenon lamp for 20 min. The samples were taken out, rinsed with deionized water, and dried at room temperature.

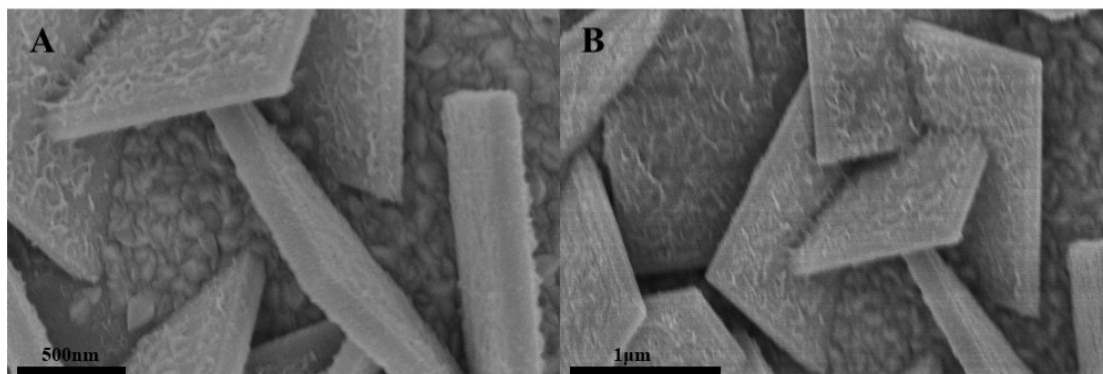

Fig. S1 SEM images of  $\text{TiO}_2$  NSs after photo deposition of  $\text{MnO}_2$

## SI-2

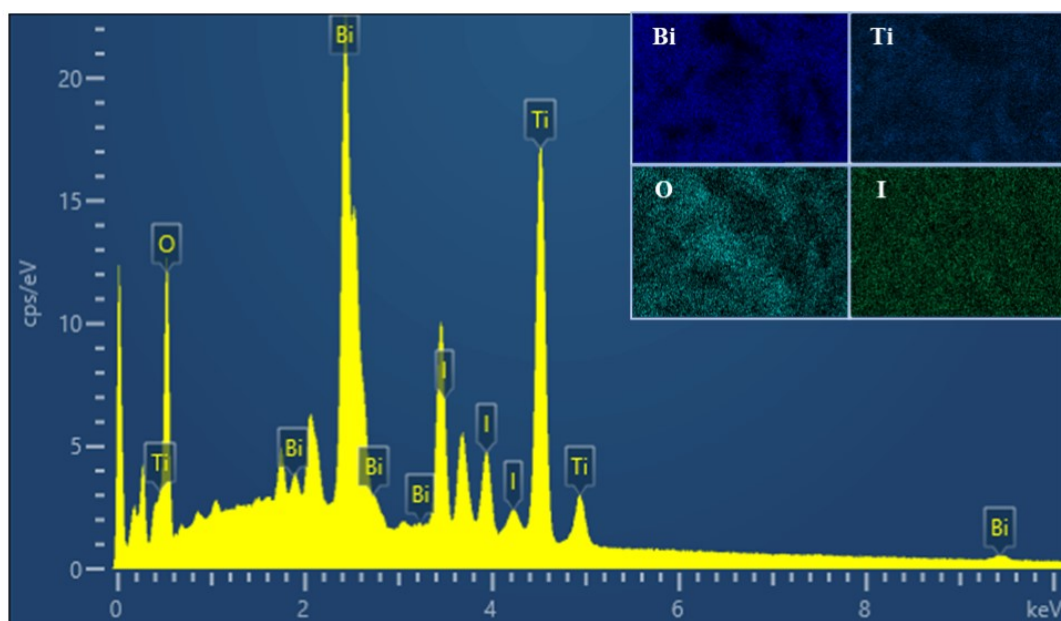

Fig. S2 EDS spectra of TiO<sub>2</sub> NSs/BiOI NSs and EDX mapping images of TiO<sub>2</sub> NSs/BiOI NSs

## SI-3

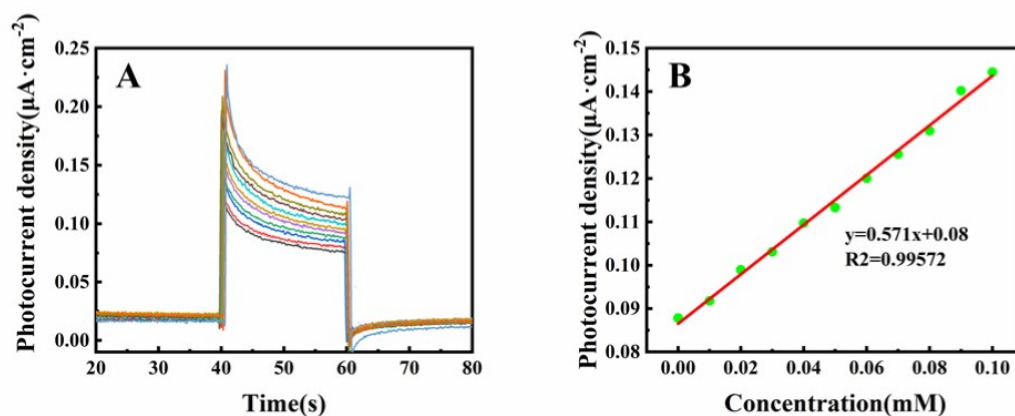

Fig. S3 (A) Photocurrent responses of TiO<sub>2</sub> NS/BiOI NS/GOx biosensors toward different concentrations of glucose from 0 to 0.1 mM in 0.1 M PBS (pH 7.4) electrolyte, under visible light irradiation (B) Linear calibration between glucose concentration versus photocurrent density
